# Supplementary material for: Women’s suggestions on how to improve the quality of maternal and newborn care: A qualitative analysis from the IMAgiNE EURO survey in Italy during the two years of the COVID-19 pandemic
Source: PubMed Central journal article supplement (PMC11494818; doi:10.18332/ejm/192143), 2024-10-22
Supplement: EJM-8-62-s1.pdf [file EJM-8-62-s1.pdf]

**Supplementary Table 1. Characteristics comparison between women providing or not providing a comment to the open-ended question among women who answered in Italian and who gave born in Italy.**

|                                |                                                      | Women providing a comment<br>to the open-ended question |                 | p-<br>value |
|--------------------------------|------------------------------------------------------|---------------------------------------------------------|-----------------|-------------|
|                                |                                                      | Yes                                                     | No              |             |
|                                |                                                      | N=2017<br>n (%)                                         | N=5911<br>n (%) |             |
| Year of birth                  | 2020                                                 | 1311 (65.0)                                             | 3787 (64.1)     | 0.451       |
|                                | 2021                                                 | 632 (31.3)                                              | 1619 (27.4)     | 0.001       |
|                                | 2022                                                 | 65 (3.2)                                                | 212 (3.6)       | 0.442       |
|                                | Missing                                              | 9 (0.4)                                                 | 293 (5.0)       | <0.001      |
| Maternal country of<br>birth   | Italy                                                | 1922 (95.3)                                             | 5421 (91.7)     | <0.001      |
|                                | Other country                                        | 95 (4.7)                                                | 252 (4.3)       | 0.397       |
|                                | Missing                                              | 0 (0.0)                                                 | 238 (4.0)       | <0.001      |
| Maternal age range<br>(years)  | 18-24                                                | 40 (2.0)                                                | 110 (1.9)       | 0.728       |
|                                | 25-30                                                | 409 (20.3)                                              | 1238 (20.9)     | 0.524       |
|                                | 31-35                                                | 878 (43.5)                                              | 2408 (40.7)     | 0.028       |
|                                | 36-39                                                | 499 (24.7)                                              | 1379 (23.3)     | 0.198       |
|                                | ≥40                                                  | 191 (9.5)                                               | 540 (9.1)       | 0.654       |
|                                | Missing                                              | 0 (0.0)                                                 | 236 (4.0)       | <0.001      |
| Educational level <sup>1</sup> | None                                                 | 0 (0.0)                                                 | 3 (0.1)         | 0.576       |
|                                | Elementary school                                    | 1 (0.0)                                                 | 2 (0.0)         | >0.99       |
|                                | Junior High school                                   | 70 (3.5)                                                | 271 (4.6)       | 0.033       |
|                                | High School                                          | 743 (36.8)                                              | 2276 (38.5)     | 0.183       |
|                                | University degree                                    | 590 (29.3)                                              | 1648 (27.9)     | 0.237       |
|                                | Postgraduate degree /<br>Master /Doctorate or higher | 611 (30.3)                                              | 1475 (25.0)     | <0.001      |
|                                | Missing                                              | 2 (0.1)                                                 | 236 (4.0)       | <0.001      |
| Parity                         | 1                                                    | 1467 (72.7)                                             | 3829 (64.8)     | <0.001      |
|                                | >1                                                   | 550 (27.3)                                              | 1844 (31.2)     | 0.001       |
|                                | Missing                                              | 0 (0.0)                                                 | 238 (4.0)       | <0.001      |
| Type of hospital               | Public                                               | 1887 (93.6)                                             | 5217 (88.3)     | <0.001      |
|                                | Private                                              | 130 (6.4)                                               | 457 (7.7)       | 0.057       |
|                                | Missing                                              | 0 (0.0)                                                 | 237 (4.0)       | <0.001      |

|                                                                       |                                                                          | Women providing a comment to the open-ended question |             |         |
|-----------------------------------------------------------------------|--------------------------------------------------------------------------|------------------------------------------------------|-------------|---------|
|                                                                       |                                                                          | Yes                                                  | No          | p-value |
| Mode of birth                                                         | Spontaneous vaginal birth                                                | 1250 (62.0)                                          | 3835 (64.9) | 0.020   |
|                                                                       | Instrumental vaginal birth                                               | 170 (8.4)                                            | 409 (6.9)   | 0.028   |
|                                                                       | Caesarean section                                                        | 597 (29.6)                                           | 1667 (28.2) | 0.242   |
| Infant feeding                                                        | Exclusive breastfeeding                                                  | 1293 (64.1)                                          | 3930 (66.5) | 0.051   |
|                                                                       | Partial breastfeeding                                                    | 616 (30.5)                                           | 1635 (27.7) | 0.013   |
|                                                                       | Formula                                                                  | 108 (5.4)                                            | 346 (5.9)   | 0.405   |
| Companion allowed to stay                                             | Always/nearly always                                                     | 287 (14.2)                                           | 1332 (22.5) | <0.001  |
|                                                                       | Sometimes                                                                | 451 (22.4)                                           | 1453 (24.6) | 0.044   |
|                                                                       | Never/almost never                                                       | 1279 (63.4)                                          | 3126 (52.9) | <0.001  |
| Type of healthcare providers who directly assisted birth <sup>2</sup> | Midwife                                                                  | 1740 (86.3)                                          | 5017 (84.9) | 0.138   |
|                                                                       | Nurse                                                                    | 508 (25.2)                                           | 1591 (26.9) | 0.136   |
|                                                                       | A student (i.g before graduation)                                        | 104 (5.2)                                            | 284 (4.8)   | 0.567   |
|                                                                       | Obstetrics registrar / medical resident (under post-graduation training) | 314 (15.6)                                           | 792 (13.4)  | 0.017   |
|                                                                       | Obstetrics and gynaecology doctor                                        | 1129 (56.0)                                          | 3205 (54.2) | 0.180   |
|                                                                       | I don't know (healthcare providers did not introduce themselves)         | 213 (10.6)                                           | 315 (5.3)   | <0.001  |
|                                                                       | Other                                                                    | 158 (7.8)                                            | 301 (5.1)   | <0.001  |
| Other conditions                                                      | Newborn admission in ICU/SCBU                                            | 211 (10.5)                                           | 582 (9.8)   | 0.452   |
|                                                                       | Maternal admission in ICU                                                | 5 (0.2)                                              | 12 (0.2)    | 0.922   |
|                                                                       | Multiple birth                                                           | 25 (1.2)                                             | 65 (1.1)    | 0.696   |

<sup>1</sup>Wording on education levels agreed among partners during the Delphi. Questionnaire translated and back-translated according to ISPOR Task Force for Translation and Cultural Adaptation Principles of Good Practice; <sup>2</sup> More than one possible answer.

Abbreviations: ICU=intensive care unit; SCBU=special care baby unit.
